# Supplementary material
Source: Springer Nature journal article supplement (https://www.springermedizin.de/resource/supplementary/12885_2013_5283_MOESM4_ESM.pdf/9465620)
Supplement: MOESM4 [file 9465620]

**Additional Information Table S1D.** Study characteristics of articles included in the review investigating IGF1R expression prevalences in breast cancer, *in situ* carcinoma, benign breast disease, and normal breast tissue.

| Reference                                           | Study population                                      |                     |                                                     | Patient and tumor characteristics |                   |                |                          | Histology |                        |        |        |         |          | IHC |     |       |     |            |                                |      |
|-----------------------------------------------------|-------------------------------------------------------|---------------------|-----------------------------------------------------|-----------------------------------|-------------------|----------------|--------------------------|-----------|------------------------|--------|--------|---------|----------|-----|-----|-------|-----|------------|--------------------------------|------|
|                                                     | First author<br>Year, Country of patient<br>inclusion | Inclusion<br>period | No. of<br>invasive<br>cancers<br>(+other<br>tissue) | Important<br>selection criteria   | Age(range/<br>SD) | Tumor size*    | Histological grade       |           | LN <sup>+</sup><br>(%) | Normal | Benign | In situ | invasive | IDC | ILC | Other | TMA | Cores (mm) | Antibody<br>(manufacturer)     | Obs. |
|                                                     |                                                       |                     |                                                     |                                   | pT                | 0%             | 100%                     | 0%        | 100%                   |        |        |         |          |     |     |       |     |            |                                |      |
| <b>Gallardo, A.[122]</b><br>2012, Spain             | ns                                                    | 138                 | HER2+                                               | 55(31-92)                         | 25 (10-200)       | I<br>II<br>III |                          | 57        | ○                      | ○      | ○      | ●       | ○        | ○   | ○   | ●     | 3   | ns         | 24-31<br>(Neomarkers)          | 3    |
| <b>Fu, P.[123]</b><br>2012, Japan                   | 2001-2009                                             | 77                  | -                                                   | ns                                | 1<br>2/3          |                | I/II <sup>b</sup><br>III | 35        | ○                      | ○      | ○      | ●       | ○        | ○   | ○   | ○     |     |            | 3027 (Cell<br>Signaling)       | ns   |
| <b>Iqbal J.[124]</b><br>2012, Singapore             | ns                                                    | 144                 | TN                                                  | 53(28-88)                         | 1<br>2/3          |                | I<br>II<br>III           | 28        | ○                      | ○      | ○      | ○       | ●        | ●   | ●   | ●     | 2   | 1.0        | Clone 3027<br>(Cell Signaling) | 2    |
| <b>Kurebayashi, J.[125]</b><br>2012, Japan          | 1999-2003                                             | 261                 | -                                                   | 59(ns)                            | 1<br>2/3          |                | I<br>II<br>III           | 20        | ○                      | ○      | ○      | ●       | ○        | ○   | ○   | ○     |     |            | 24-31<br>(Millipore)           | 1    |
| <b>Taromaru, G.C.[126]</b><br>2012, Brazil          | 2002-2008                                             | 110<br>(+110)       | including DCIS                                      | 55(26-90)                         | ns                | ns             | ns                       | ns        | ○                      | ○      | ●      | ○       | ●        | ○   | ○   | ○     |     |            | 24-31<br>(Pleasanton)          | 2    |
| <b>Yerushalmi, R.[127]</b><br>2012, Canada          | 1986-1992                                             | 2871                | -                                                   | ns                                | 1<br>2<br>3       |                | I<br>II<br>III           | 46        | ○                      | ○      | ○      | ●       | ○        | ○   | ○   | ●     | ns  | 0.6        | Sc-713 (Santa<br>Cruz)         | 1    |
| <b>Vermeulen, J.F.[36]</b><br>2012, The Netherlands | 1997-2007                                             | 462                 | -                                                   | 60 <sup>a</sup> (28-88)           | 1<br>2<br>3       |                | I<br>II<br>III           | 48        | ○                      | ○      | ○      | ○       | ●        | ●   | ●   | ●     | 3   | 0.6        | NB110-87052<br>(Novus)         | 1    |
| <b>Bhargava, R.[128]</b><br>2011, USA               | ns                                                    | 191                 | -                                                   | ns                                | ns                | ns             | ns                       | ns        | ○                      | ○      | ○      | ○       | ●        | ●   | ●   | ●     | 2   | ns         | G11 (Ventana)                  | ns   |
| <b>Drury, S.C.[129]</b><br>2011, UK                 | 1981-2004                                             | 49                  | recurrence                                          | 55(28-81)                         | 20 (3-70)         | I<br>II<br>III |                          | 23        | ○                      | ○      | ○      | ●       | ○        | ○   | ○   | ●     | 2*3 | 0.6        | G11 (Ventana)                  | 2    |
| <b>Fu, P.[130]</b><br>2011, Japan                   | 2001-2009                                             | 296                 | -                                                   | 59(21-93)                         | 1<br>2/3          |                | I/II <sup>b</sup><br>III | 39        | ○                      | ○      | ○      | ●       | ○        | ○   | ○   | ○     |     |            | Clone 3027<br>(Cell Signaling) | ns   |
| <b>Hartog, H.[131]</b><br>2011, The Netherlands     | 1996-2005                                             | 368                 | -                                                   | 59(27-91)                         | 1<br>2<br>3       |                | I<br>II<br>III           | 46        | ○                      | ○      | ○      | ○       | ●        | ○   | ○   | ●     | ns  | ns         | 24-31<br>(Calbiochem)          | 1    |
| <b>Peiró, G.[132]</b><br>2011, Spain                | 1990-2001                                             | 178                 | LN-, stage I-II                                     | 52 <sup>a</sup> (23-88)           | 1<br>2<br>3       |                | I<br>II<br>III           | 0         | ○                      | ○      | ○      | ○       | ●        | ●   | ○   | ●     | ns  | 0.6        | ns<br>(Neomarkers)             | 2    |
| <b>Tamimi, R.M.[133]</b><br>2011, USA               | 1976-1996                                             | 0<br>(+493)         | -                                                   | 46 <sup>a</sup> (9)               | na                | na             | na                       | na        | ●                      | ●      | ○      | ○       | ○        | ○   | ○   | ●     | 3   | 0.6        | 24-31 (Lab<br>Vision)          | ns   |
| <b>Kim, J.H.[134]</b>                               | 2000-2006                                             | 453                 | -                                                   | 46(23-84)                         | 1<br>2            |                | I<br>II                  | 42        | ○                      | ○      | ○      | ●       | ○        | ○   | ○   | ●     | ns  | 6.0        | ns (Cell                       | ns   |



| <b>Shimizu, C.[152]</b><br>2004, Japan    | 1997-1997 | 210         | - | 53(25-83)               | 22 (1-140) | I<br>II<br>III |  | 45 | ○ ○ ○ ○ ● ● ● ○ | 24-31 (ns)        | ns                |   |  |
|-------------------------------------------|-----------|-------------|---|-------------------------|------------|----------------|--|----|-----------------|-------------------|-------------------|---|--|
| <b>Koda, M.[153]</b><br>2003, Poland      | 2000-2002 | 50          | - | 55 <sup>a</sup> (30-80) | ns         | I<br>II<br>III |  | 49 | ○ ○ ○ ○ ● ○ ○ ○ | H-60 (Santa Cruz) | 2                 |   |  |
| <b>Ouban, A.[154]</b><br>2003, USA        | ns        | 8           | - | 63(18-93)               | ns         | ns             |  | ns | ○ ○ ○ ○ ● ● ○ ● | ns ns             | C-20 (Santa Cruz) | 2 |  |
| <b>Happerfield, L.C.[155]</b><br>1997, UK | ns        | 89<br>(+15) | - | ns                      | ns         | I<br>II<br>III |  | ns | ● ● ○ ○ ● ● ○ ○ | αIR3 (na)         | ns                |   |  |
| <b>Turner, B.C.[156]</b><br>1997, USA     | ns        | 94          | - | ns                      | 19 (ns)    | ns             |  | 11 | ○ ○ ○ ○ ● ○ ○ ○ | ns (Santa Cruz)   | 1                 |   |  |

a: mean; \*: mean size in mm (range or SD); b: nuclear grade; ns: not stated; na: not applicable; ○: tissue not investigated; ●: tissue investigated; ◎: both TMA and full sections investigated; IDC: invasive ductal carcinoma; ILC: invasive lobular carcinoma; IBC: inflammatory breast cancer; ABC: advanced breast cancer; TN: triple negative; LN: lymph node; TMA: tissue microarray PT: phyllodes tumors FA: fibroadenoma; M: distant metastasis, Obs.: number of observers evaluating staining result, +: positive; -: negative
